# Supplementary material for: Optimization of two-dimensional gel electrophoresis for proteome analysis of suspension-cultured ginseng cells
Source: Royal Society of Chemistry journal article supplement (doi:10.1039/c3ay40527c), 2013-01-01
Supplement: c3ay40527c.pdf [file c3ay40527c.pdf]

## Supplementary information

| Spot no.                           | Protein name                                                                   | Accession no. | Mr (kDa)  |              | pI        |              | Protein Score | Pep. count |
|------------------------------------|--------------------------------------------------------------------------------|---------------|-----------|--------------|-----------|--------------|---------------|------------|
|                                    |                                                                                |               | Theoretic | Experimental | Theoretic | Experimental |               |            |
| Defense and stress response        |                                                                                |               |           |              |           |              |               |            |
| ↑1608                              | Chaperonin cpn60                                                               | gi 357442729  | 61.5      | 49.5         | 6.27      | 5.51         | 154           | 3          |
| ↑5409                              | Monodehydroascorbate reductase (MDAR)                                          | gi 225440936  | 47.5      | 43.2         | 6.32      | 6.7          | 217           | 7          |
| ↑7301                              | Cinnamyl alcohol dehydrogenase                                                 | gi 206236379  | 20.1      | 27.4         | 7.93      | 7.13         | 225           | 3          |
| ↑2311                              | Putative orcinol O-methyltransferase                                           | gi 161444215  | 26.0      | 26.1         | 6.09      | 5.6          | 685           | 6          |
| Energy metabolism                  |                                                                                |               |           |              |           |              |               |            |
| ↑7707                              | Phosphoenolpyruvate carboxykinase [ATP]                                        | gi 255537864  | 73.8      | 61.28        | 6.57      | 7.31         | 448           | 13         |
| ↑5207                              | Malate dehydrogenase                                                           | gi 225461618  | 37.1      | 22.4         | 8.76      | 6.73         | 447           | 6          |
| ↑4802                              | Methionine synthase                                                            | gi 8439545    | 84.9      | 79.9         | 5.93      | 6.33         | 361           | 12         |
| ↑5701                              | Methionine synthase                                                            | gi 8439545    | 84.89     | 65.4         | 5.93      | 6.57         | 540           | 14         |
| ↑8608                              | Pyrophosphate-dependent phosphofructokinase alpha subunit                      | gi 3790102    | 68.13     | 55           | 6.71      | 7.85         | 260           | 12         |
| ↑4106                              | Predicted: triosephosphate isomerase, cytosolic-like                           | gi 357134081  | 27.2      | 24.9         | 5.24      | 6.43         | 79            | 6          |
| ↑6705                              | 5-methyltetrahydropteroyltriglutamate-homocysteine methyltransferase, putative | gi 255549601  | 90.5      | 83.3         | 6.45      | 6.85         | 510           | 11         |
| Signal transduction/ transcription |                                                                                |               |           |              |           |              |               |            |
| NI0502                             | Vacuolar ATPase subunit B                                                      | gi 118429132  | 54.2      | 43.7         | 4.93      | 4.56         | 145           | 5          |
| ↓8112                              | Putative RAN2 small Ras GTP-binding nuclear protein                            | gi 87046111   | 25.3      | 15.2         | 6.65      | 7.54         | 649           | 11         |
| ↑9901                              | TUDOR-SN protein 1                                                             | gi 343172567  | 23.32     | 23.1         | 9.23      | 7.81         | 234           | 7          |
| ↑1409                              | Predicted: eukaryotic initiation factor 4A-11                                  | gi 225429488  | 47.1      | 35.9         | 5.38      | 5.44         | 578           | 16         |

---

|                                  |                                                                      |              |       |      |      |      |     |   |
|----------------------------------|----------------------------------------------------------------------|--------------|-------|------|------|------|-----|---|
| Protein synthesis and metabolism |                                                                      |              |       |      |      |      |     |   |
| ↓3407                            | Predicted: elongation factor Tu, chloroplastic-like                  | gi 356513781 | 52.6  | 33.4 | 6.33 | 6.17 | 398 | 7 |
| ↑5503                            | Predicted: 26S proteasome regulatory subunit 4<br>homolog A-like 26S | gi 356537286 | 49.47 | 43.1 | 5.91 | 6.65 | 348 | 8 |
| ↑1302                            | Predicted: adenosine kinase 2                                        | gi 225449018 | 38.2  | 25.5 | 5.31 | 5.36 | 267 | 5 |
| ↑6604                            | Branched-chain-amino-acid aminotransferase-like protein<br>2-like    | gi 356533600 | 70.9  | 69.7 | 6.96 | 6.93 | 134 | 8 |
| ↓3213                            | Esterase D, putative                                                 | gi 255565327 | 28.7  | 27.8 | 5.33 | 6.13 | 93  | 2 |
| Photosynthesis                   |                                                                      |              |       |      |      |      |     |   |
| ↑3403                            | Ribulose-1,5-bisphosphate carboxylase/oxygenase large<br>subunit     | gi 33323298  | 45.4  | 34.2 | 8.18 | 6.04 | 127 | 5 |
| Others                           |                                                                      |              |       |      |      |      |     |   |
| ↓8315                            | Sglf212-1o14t3                                                       | gi 359713678 | 35.3  | 34.7 | 8.94 | 7.72 | 120 | 2 |
| ↑8709                            | Predicted protein                                                    | gi 224071575 | 65.8  | 57.5 | 6.17 | 7.84 | 97  | 8 |
| ↑0307                            | No results                                                           |              |       |      |      |      |     |   |

---
