# Supplementary material for: Optimization of two-dimensional gel electrophoresis for proteome analysis of suspension-cultured ginseng cells
Source: Royal Society of Chemistry journal article supplement (doi:10.1039/c3ay40527c), 2013-01-01
Supplement: c3ay40527c_2.pdf [file c3ay40527c_2.pdf]

## Search parameters

Database: NCBI

Taxonomy: Viridiplantae (1093002)

Taxonomy: EST\_Viridiplantae (11196691)

Type of search: Combined (MS+ MS/MS)

Enzyme: Trypsin

Fixed modifications: Carbamidomethyl (C)

Dynamical modifications: Oxidation (M)

Mass values: Monoisotopic

Protein Mass: Unrestricted

Peptide Mass Tolerance:  $\pm 100$  ppm

Fragment Mass Tolerance:  $\pm 0.4$  Da

Peptide Charge State: 1+

Max Missed Cleavages: 1
